# Supplementary material for: Water-assisted single-step catalytic hydrodeoxygenation of polyethylene terephthalate into gasoline- and jet fuel-range cycloalkanes over supported Ru catalysts in a biphasic system
Source: Royal Society of Chemistry journal article supplement (doi:10.1039/d3gc02145a), 2023-01-01
Supplement: d3gc02145a1.pdf [file d3gc02145a1.pdf]

Supporting information for

**Water-assisted single-step catalytic  
hydrodeoxygenation of polyethylene  
terephthalate into gasoline- and jet fuel-range  
cycloalkanes over supported Ru catalysts in a  
biphasic system**

Vishnu Murali<sup>a</sup>, Jung Rae Kim<sup>a</sup>, Young-Kwon Park<sup>b</sup>, Jeong-Myeong Ha<sup>c</sup>, Jungho

Jae<sup>a,\*</sup>

<sup>a</sup>School of Chemical Engineering, Pusan National University, Busan 46241, Republic of  
Korea

<sup>b</sup>School of Environmental Engineering, University of Seoul, Seoul 02504, Republic of Korea

<sup>c</sup>Clean Energy Research Center, Korea Institute of Science and Technology, Seoul 02792,  
Republic of Korea

\*Corresponding author: Tel.: +82-51-510-2989; E-mail: [jh.jae@pusan.ac.kr](mailto:jh.jae@pusan.ac.kr) (J. Jae).

## 1. Catalyst synthesis

All the Ru-based nano catalysts were prepared by IWI method with an appropriate amount of aqueous solution of  $\text{RuCl}_3 \cdot x\text{H}_2\text{O}$ . The obtained samples were dried at 100 °C for 12 h.

**Table S1** Conditions used for the synthesis of Ru/S, (S=Support) catalyst

| No | Catalyst Type       | Drying condition | Calcination condition | Reduction condition |
|----|---------------------|------------------|-----------------------|---------------------|
| 1  | Ru/TiO <sub>2</sub> | 100 °C, 12 h     | -                     | 400 °C, 4 h         |
| 2  | Ru/HZSM-5           | 100 °C, 12 h     | 500 °C, 5 h           | 250 °C, 2 h         |
| 3  | Ru/C                | 80 °C, 12 h      | -                     | 400 °C, 4 h         |
| 4  | Ru/HY(30)           | 100 °C, 12 h     | 500 °C, 4 h           | 400 °C, 4 h         |
| 5  | Ru/ZrO <sub>2</sub> | 100 °C, 12 h     | 500 °C, 5 h           | 450 °C, 4 h         |

## 2. Calculation methods for the conversion of PET and selectivity of different products in PET HDO reaction.

The PET conversion and selectivity of products were calculated according to the following equations.

$$\text{Conversion of PET waste (\%)} = \frac{\text{Initial weight of PET waste} - \text{The Weight of unreacted PET}}{\text{Initial weight of PET waste}} * 100 \quad (1)$$

$$\text{The weight of unreacted PET} = \text{The weight of residual solid (g)} - \text{Introduced catalyst amount (g)} \quad (2)$$

$$\text{Selectivity [\% C]} = \frac{\text{Amount of each products [mol - C]}}{\Sigma \text{Amount of products [mol - C]}} * 100 \quad (3)$$

$$\text{Yield [\% C]} = \frac{\text{Conversion} * \text{Selectivity}}{100} \quad (4)$$

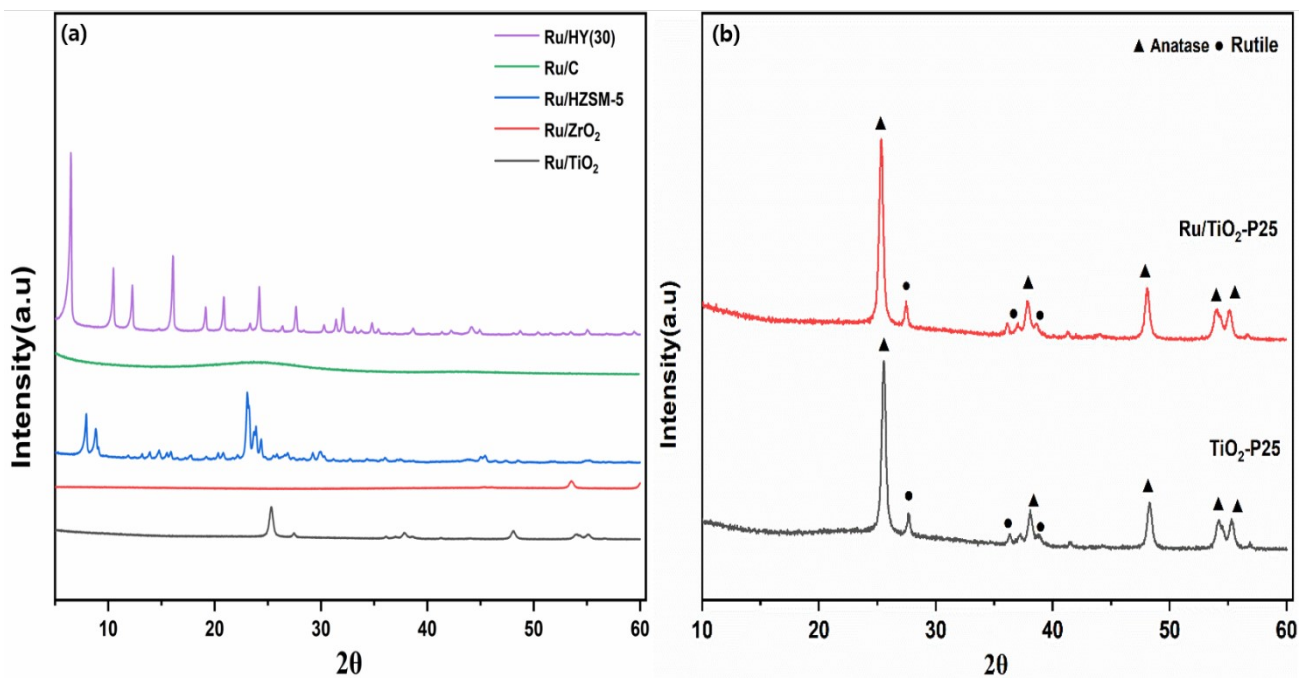

### 3. Catalyst characterization

Fig. S1 The XRD pattern a) Ru/S (support) b) Ru/TiO<sub>2</sub> and TiO<sub>2</sub>-P25.

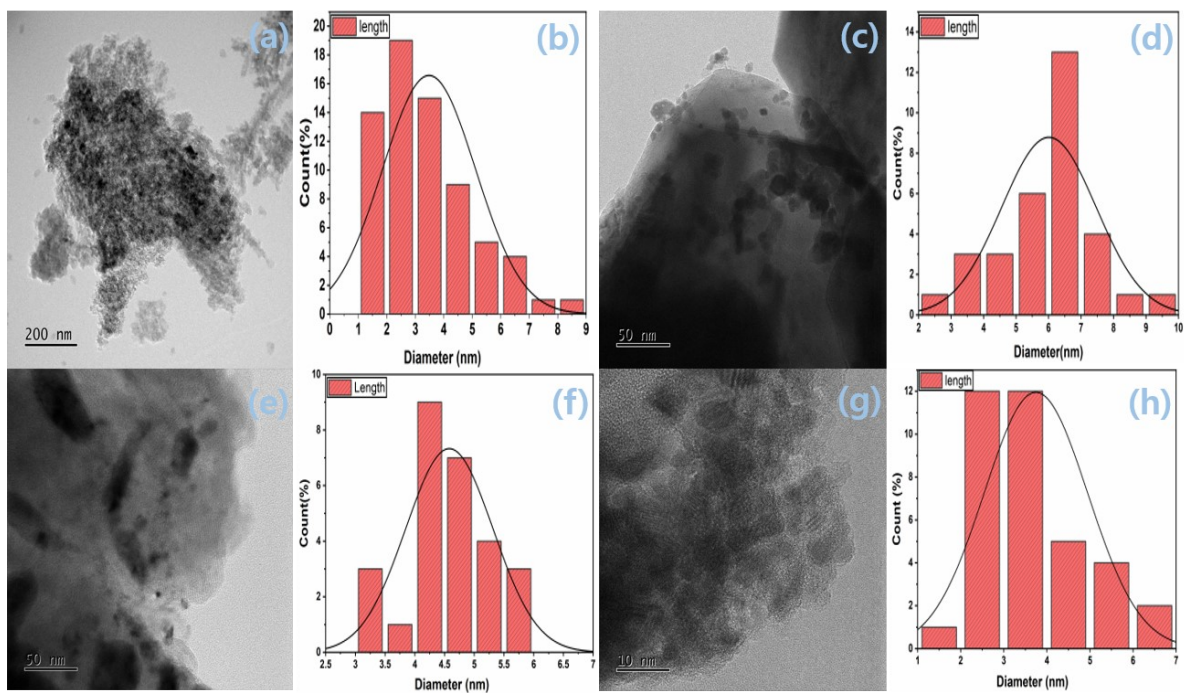

**Fig. S2** TEM micrograph image and histogram of different catalysts: (a,b) Ru/C , (c,d) Ru/ZrO<sub>2</sub>, (e,f) Ru/HY(30), (g,h) Ru/HZSM-5

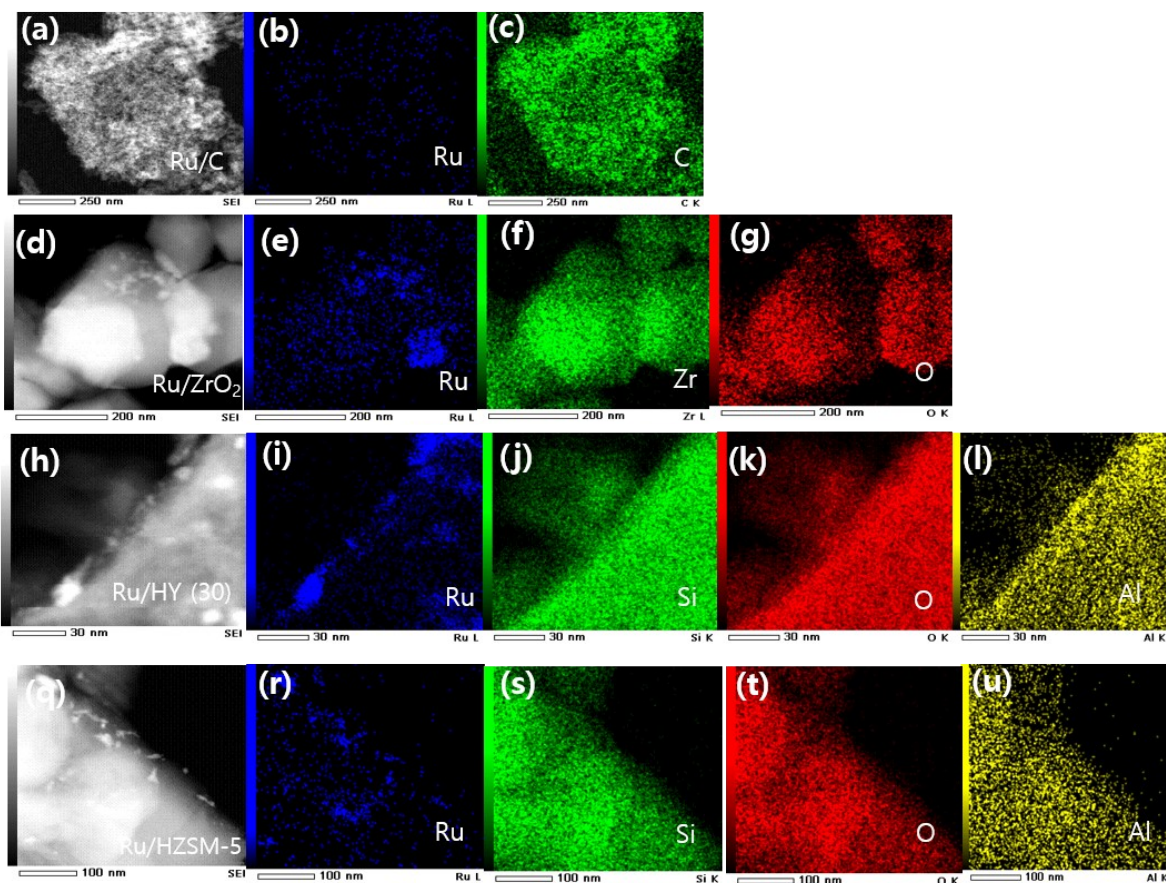

**Fig. S3** TEM-EDS mapping of prepared catalysts: (a-c) Ru/C, (d-g) Ru/ZrO<sub>2</sub>, (h-l) Ru/HY (30), (q-u) Ru/HZSM-5.

**Table S2** Ru (wt%) content in metal supported catalysts based on the EDS mapping data.

| Catalyst            | Ru<br>wt(%) |
|---------------------|-------------|
| Ru-TiO <sub>2</sub> | 1.89        |
| Ru-C                | 1.58        |
| Ru-ZrO <sub>2</sub> | 1.88        |

|                  |      |
|------------------|------|
| <b>Ru-HZSM-5</b> | 1.8  |
| <b>Ru-HY(30)</b> | 1.66 |

---

#### 4. Contact angle measurements

To investigate the wettability of Ru-supported catalysts, here we chose Ru/C, Ru/TiO<sub>2</sub> and Ru/HZSM-5 (neutral, medium and strong acidic supports) as the reference samples. The contact angle of water on the surface of the catalyst was measured and the results were shown in (Fig. S3). From the study the Ru/TiO<sub>2</sub> catalyst has a contact angle of 45.4 °, indicating a very hydrophilic character. Whereas the catalyst Ru/HZSM-5 assigned the contact angle of 89.9 ° indicating an amphiphilic behavior and the Ru/C showed a contact angle > 90 ° signifying high hydrophobic behavior.

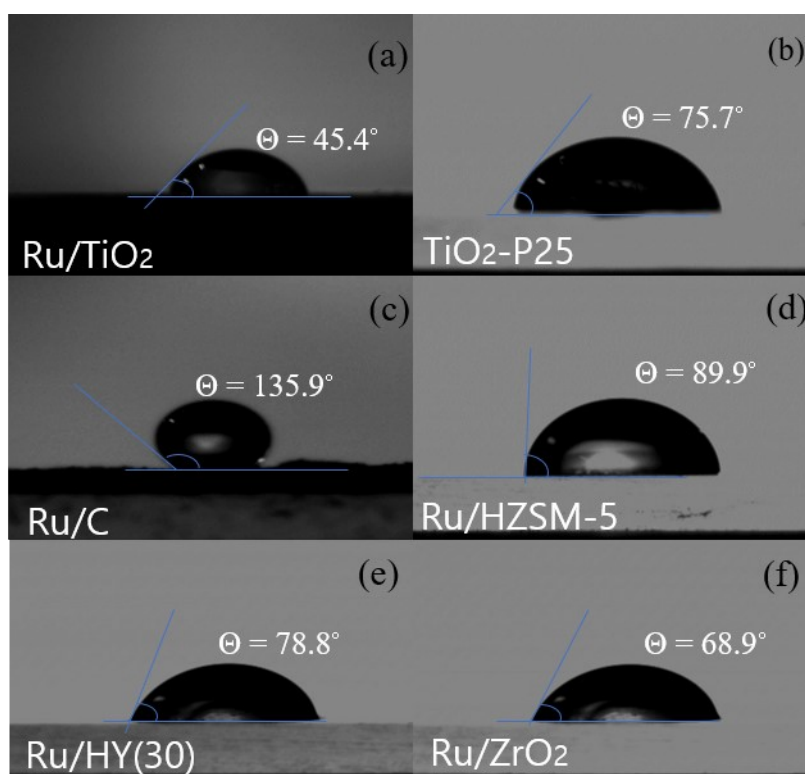

**Fig. S4** Contact angle of different catalyst support a) Ru/TiO<sub>2</sub>, b) TiO<sub>2</sub>-P25, c) Ru/C, d) Ru/HZSM-5, e) Ru/HY(30), f) Ru/ZrO<sub>2</sub>

**Table S3** The contact angle of different catalyst supports

| <b>Catalyst</b>       | <b>Contact angle (<math>\theta</math>)</b> |
|-----------------------|--------------------------------------------|
| Ru/TiO <sub>2</sub>   | 45.4 °                                     |
| TiO <sub>2</sub> -P25 | 75.7 °                                     |
| Ru/HZSM-5             | 89.9 °                                     |
| Ru/C                  | 135.9 °                                    |
| Ru/ZrO <sub>2</sub>   | 68.9 °                                     |
| Ru/HY(30)             | 78.8°                                      |

## 5. PET hydrogenolysis results

**Table S4** Product distribution for PET hydrogenolysis over monophasic and biphasic systems. (Reaction condition: 0.5 g catalyst + 0.5 g PET water (monophasic and biphasic (water: n-dodecane (1:1) system), 220 °C, 50 bar H<sub>2</sub>, 12 h)

| Entry | Catalyst                                    | 0-Os HCs<br>C mol (%) | Aromatics<br>C mol (%) | 1-Os HCs<br>C mol (%) | 2-4-Os HCs<br>C mol (%) | Conversion<br>(%) |
|-------|---------------------------------------------|-----------------------|------------------------|-----------------------|-------------------------|-------------------|
| 1     | Ru/TiO <sub>2</sub> -<br>monophasic         | 2.11                  | 0.8                    | 97.1                  | 0                       | 85.3              |
| 2     | Ru/TiO <sub>2</sub> - biphasic              | 96.8                  | 0                      | 3.2                   | 0                       | 86.16             |
| 3     | Ru/C -monophasic                            | 13.1                  | 0                      | 86.87                 | 0                       | 82.11             |
| 4     | Ru/C - biphasic                             | 43.54                 | 0                      | 20.59                 | 35.58                   | 46.06             |
| 5     | Ru/ZrO <sub>2</sub> -<br>monophasic         | 16.64                 | 11.58                  | 14.43                 | 57.32                   | 35.22             |
| 6     | Ru/ZrO <sub>2</sub> -biphasic               | 73.76                 | 0                      | 26.24                 | 0                       | 14.06             |
| 7     | Ru/HZSM-5 -<br>monophasic                   | 2.03                  | 0.58                   | 74.58                 | 22.12                   | 89.26             |
| 8     | Ru/HZSM-5 -<br>biphasic                     | 41.87                 | 0                      | 1.38                  | 53.9                    | 95.08             |
| 9     | Ru/HY(30) -<br>monophasic                   | 1.91                  | 0.29                   | 4.88                  | 92.87                   | 92.89             |
| 10    | Ru/HY(30) -<br>biphasic                     | 13.58                 | 12.01                  | 0                     | 74.39                   | 94.18             |
| 11    | Ru/TiO <sub>2</sub> +HZSM-5<br>- monophasic | 3.96                  | 0                      | 56.42                 | 38.7                    | 84.3              |
| 12    | Ru/TiO <sub>2</sub> +HZSM-5<br>- biphasic   | 74.39                 | 0.44                   | 8.69                  | 16.48                   | 77.96             |



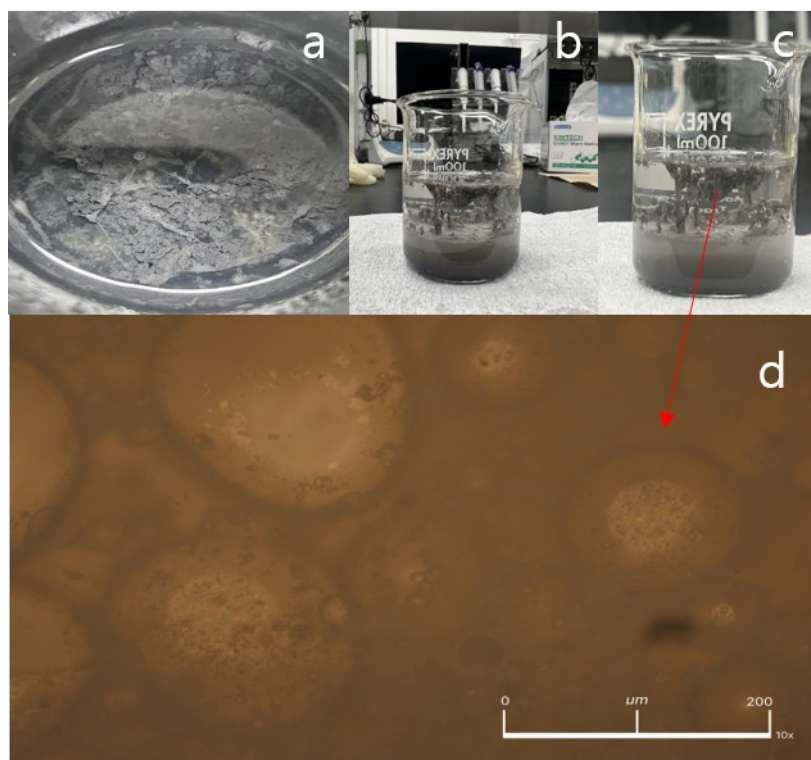

**Fig. S5** Photograph a-c) Photo of Pickering emulsion (O/W) system of Ru-TiO<sub>2</sub> Catalyst, d) optical microscope image of O/W emulsion of Ru/TiO<sub>2</sub> catalyst.

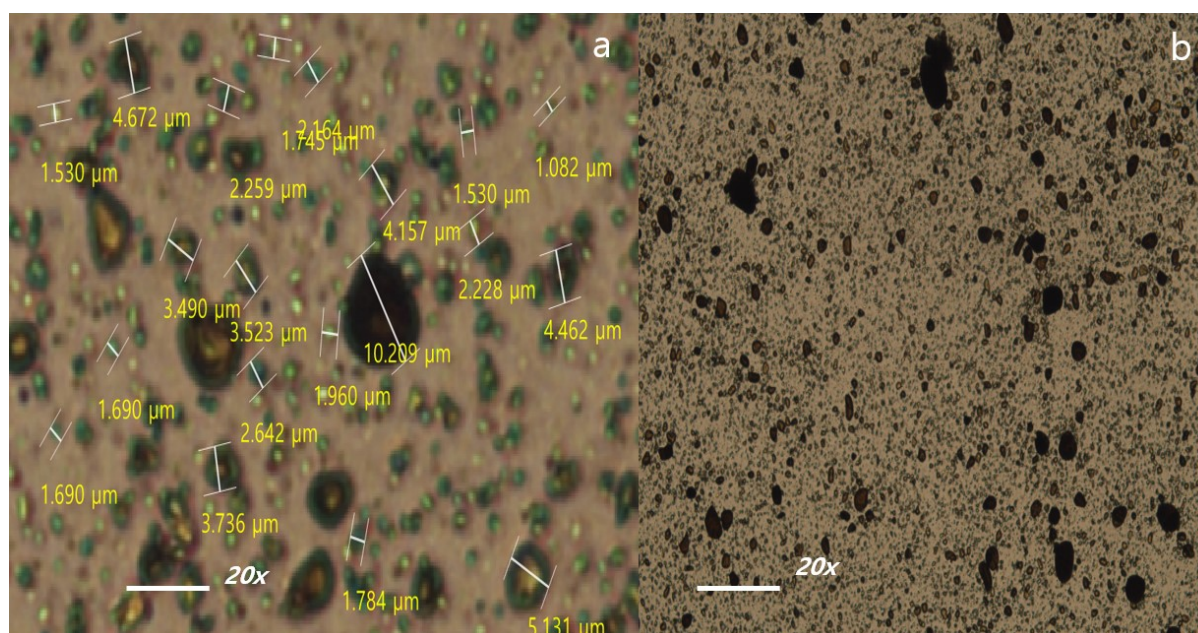



**Fig. S6 (a-b)** Optical microscopy images of W/O emulsion droplets stabilized over Ru/TiO<sub>2</sub> Catalyst in 4:1 (water: n-dodecane) biphasic system.

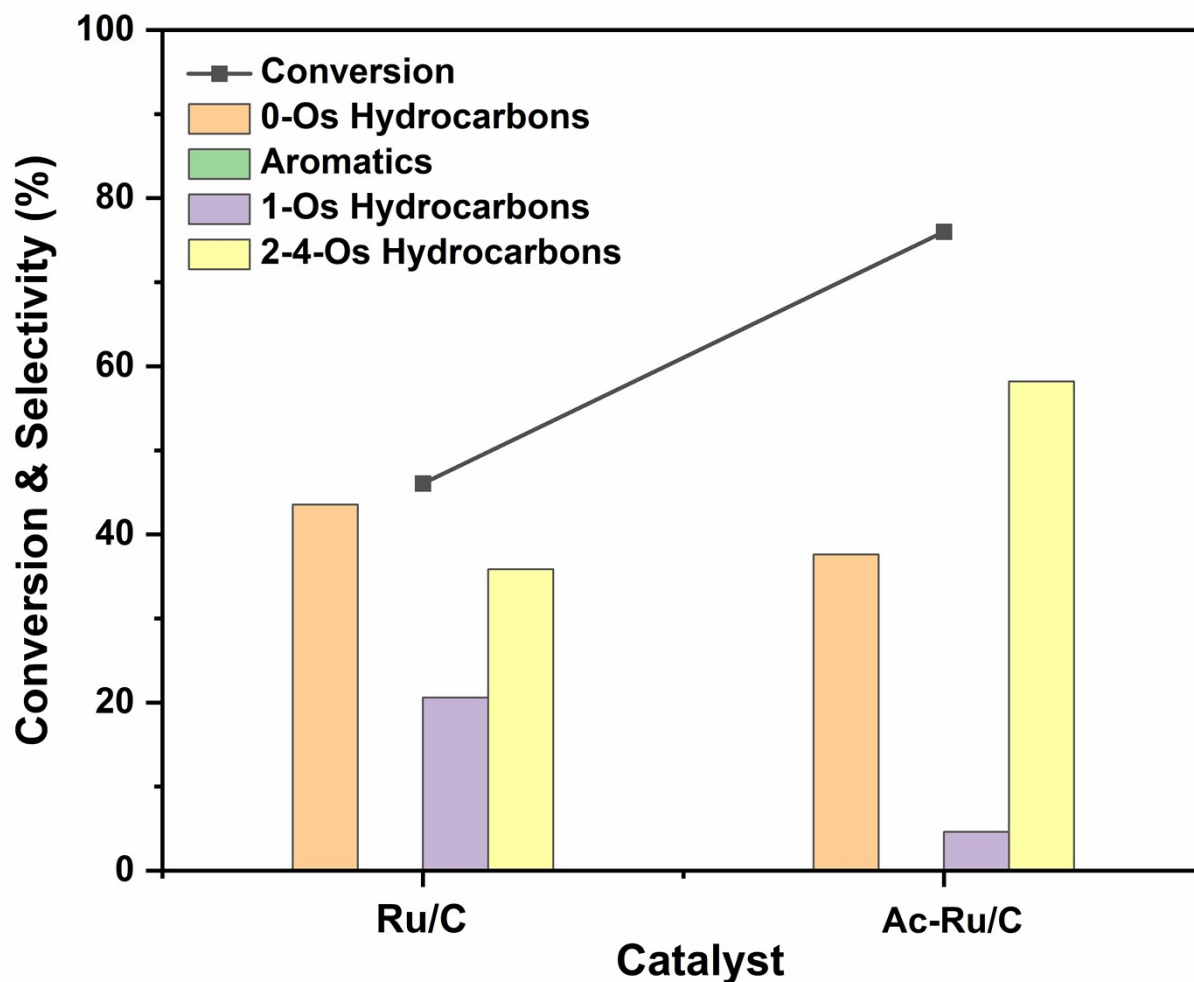

**Fig. S7** Effect of hydrophilic catalyst in PET hydrogenolysis reaction. Reaction condition: 0.5 g catalyst + 0.5 g PET in (biphasic system), 220 °C, 50 bar H<sub>2</sub>, 12 h.

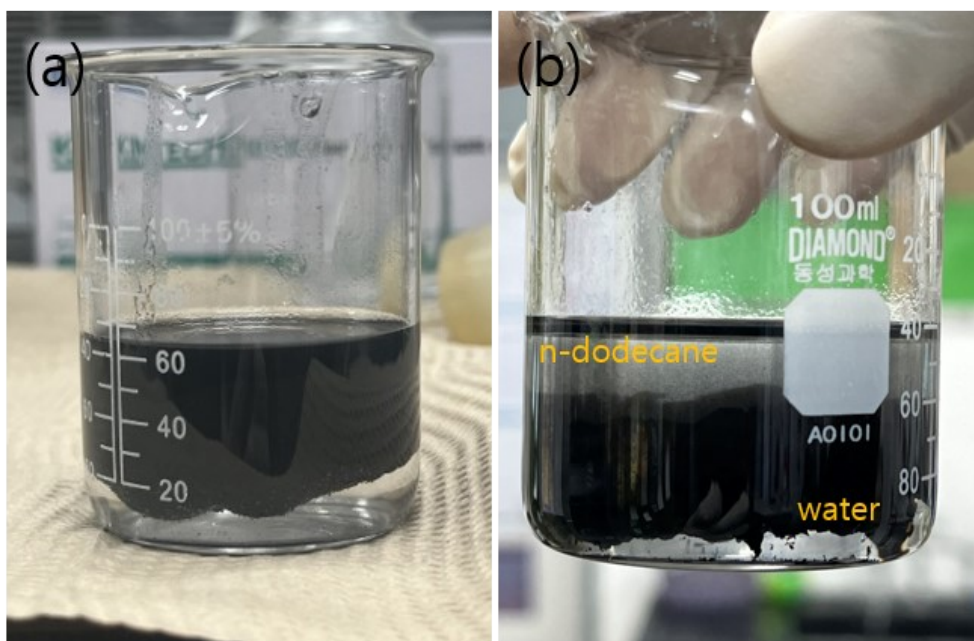

**Fig. S8** Photograph of a) (W/O) system of Ru/C, b) (O/W) emulsion system of Ac-Ru/C

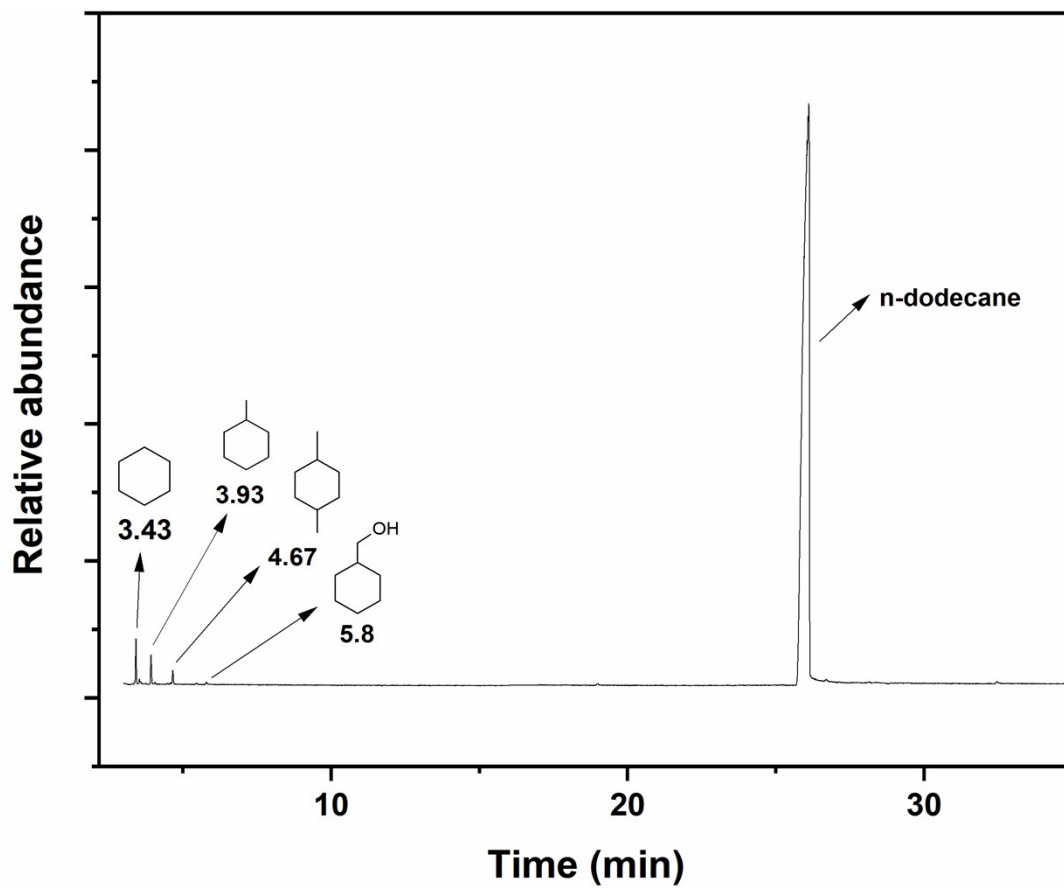

Fig. S9 GC-MS analysis of the PET HDO over Ru/TiO<sub>2</sub> catalyst in biphasic system.

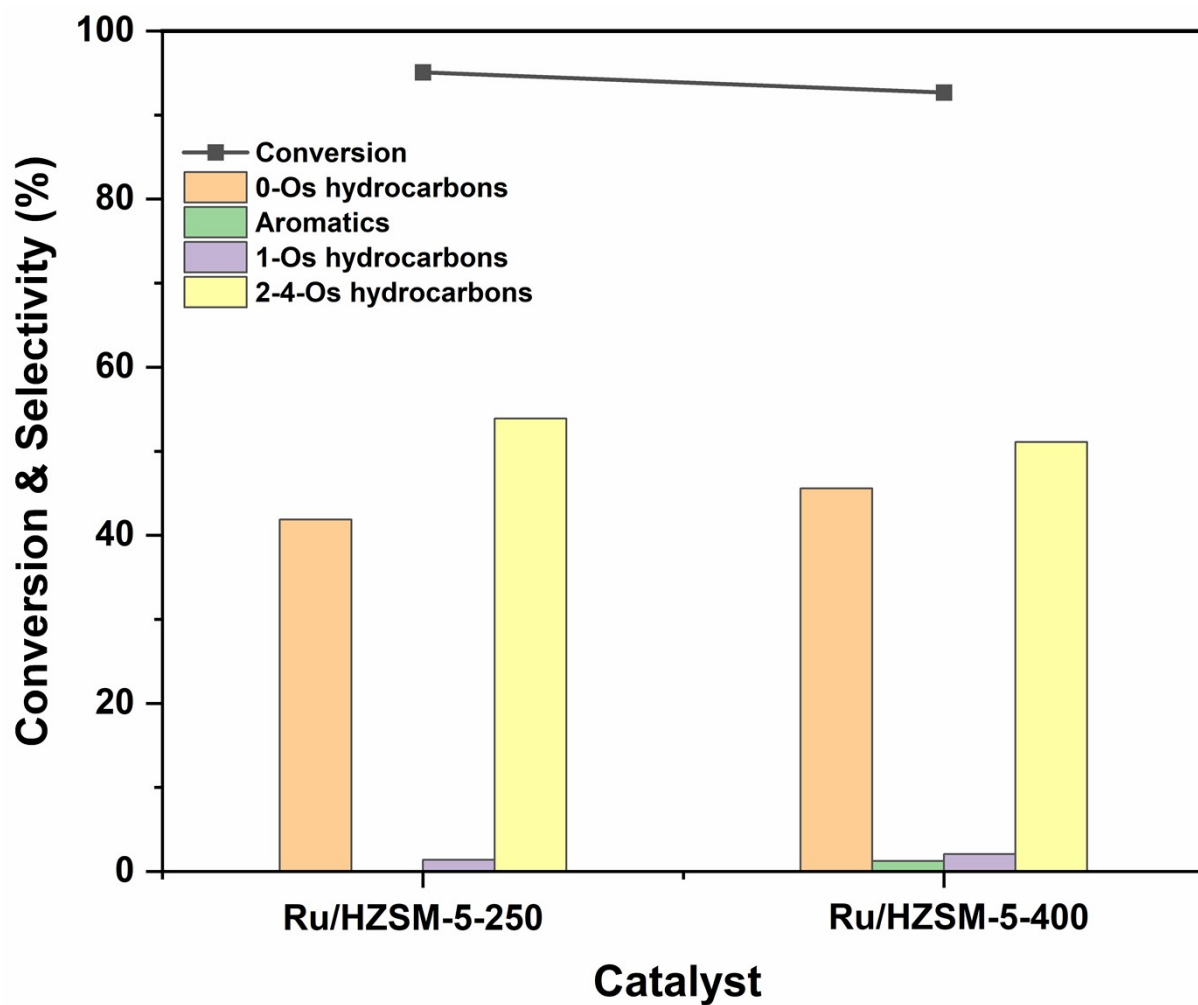

**Fig. S10** Effect of reduction temperature in PET hydrogenolysis reaction over Ru/HZSM-5. Reaction condition: 0.5 g catalyst + 0.5 g PET in (biphasic system), 220 °C, 50 bar H<sub>2</sub>, 12 h.

**Table S5** Solubility of different intermediate products in water and dodecane medium.

| No. | Products                            | Solubility in water medium | Solubility in dodecane medium |
|-----|-------------------------------------|----------------------------|-------------------------------|
| 1   | Terepathallic acid                  | Insoluble                  | Insoluble                     |
| 2   | Cyclohexane dicarboxylic acid       | Slightly soluble           | Soluble                       |
| 3   | 4-Methylcyclohexane carboxylic acid | Slightly soluble           | Soluble                       |
| 4   | Cyclohexane carboxylic acid         | Slightly soluble           | Soluble                       |
| 5   | 4-Methyl cyclohexane methanol       | Insoluble                  | Soluble                       |
| 6   | Cyclohexane methanol                | Insoluble                  | Soluble                       |
| 7   | Dimethyl cyclohexane                | Insoluble                  | Soluble                       |
| 8   | Methyl cyclohexane                  | Insoluble                  | Soluble                       |
| 9   | Cyclohexane                         | Insoluble                  | Soluble                       |
| 10  | Toluene                             | Insoluble                  | Soluble                       |
| 11  | Xylene                              | Insoluble                  | Soluble                       |
| 12  | p-Toluic acid                       | Insoluble                  | Soluble                       |

**Table S6**  
leaching test  
results)

|                                                  | First Run | Second Run | Catalyst<br>(ICP-OES) |
|--------------------------------------------------|-----------|------------|-----------------------|
| <b>Ru Concentration<br/>(<math>\mu</math>/L)</b> | Ru        | Ru         |                       |
| <b>water layer</b>                               | 0         | 0          |                       |
| <b>Oil layer</b>                                 | 0         | 0          |                       |



## 6. Calculation of Energy economy coefficient ( $\epsilon$ )

The energy economy coefficient ( $\epsilon$ ) is a useful parameter to identify the advanced process for PET hydrodeoxygenation. The advanced process would tend to possess high  $\epsilon$ .

$$\epsilon = \frac{Y}{T * t} \quad (5)$$

*Y*=yield of the main monomer,

*T*=temperature of the reaction in celsius

*t*=the reaction time in minutes.

**Table S7** Calculation of energy economy factor.

| Catalyst                            | T (°C) | Reaction time (min) | Products           | Yield of arenes or C6-C8 cyclic hydrocarbon or TPA (%) | Energy economy ( $\epsilon$ ) (°C <sup>-1</sup> *min <sup>-1</sup> ) | Ref.      |
|-------------------------------------|--------|---------------------|--------------------|--------------------------------------------------------|----------------------------------------------------------------------|-----------|
| Ru/TiO <sub>2</sub>                 | 220    | 720                 | Cyclic hydrocarbon | 87.92                                                  | 5.55E-04                                                             | This work |
| Ru-TiO <sub>2</sub>                 | 220    | 720                 | Cyclic hydrocarbon | 83.41                                                  | 5.27E-04                                                             | This work |
| Ru/Nb <sub>2</sub> O <sub>5</sub>   | 320    | 960                 | Areans             | 85                                                     | 2.77E-04                                                             | 1         |
| Ru/NiAl <sub>2</sub> O <sub>3</sub> | 320    | 960                 | Areans             | 80                                                     | 2.60E-04                                                             | 1         |
| Co/TiO <sub>2</sub>                 | 320    | 1440                | Areans             | 75.2                                                   | 1.36E-04                                                             | 2         |
| Ru/Cu/SiO <sub>2</sub>              | 400    | 1320                | Cyclic hydrocarbon | 94                                                     | 1.78E-04                                                             | 3         |
| Ru/ZrO <sub>2</sub>                 | 220    | 720                 | Areans             | 40                                                     | 2.52E-04                                                             | 4         |
| Pt/NiAl <sub>2</sub> O <sub>3</sub> | 220    | 720                 | Areans             | 3.6                                                    | 2.27E-05                                                             | 4         |
| Pd/NiAl <sub>2</sub> O <sub>3</sub> | 220    | 720                 | Areans             | 21                                                     | 1.33E-04                                                             | 4         |
| Single site C/MoO <sub>2</sub>      | 260    | 1440                | TPA                | 87                                                     | 2.32E-04                                                             | 5         |
| Nickel phosphade catalyst           | 400    | 360                 | Areans             | 84                                                     | 5.34E-04                                                             | 6         |
| CoMo/NC                             | 260    | 600                 | TPA                | 91                                                     | 5.34E-04                                                             | 7         |

## 7. Product and catalyst separation

**Table S8** Boiling points of solvents and major products.

| Substance            | Boiling point (°C) |
|----------------------|--------------------|
| n-dodecane           | 216.2              |
| Cyclohexane          | 80.75              |
| Methyl cyclohexane   | 101                |
| Dimethyl cyclohexane | 124-125            |

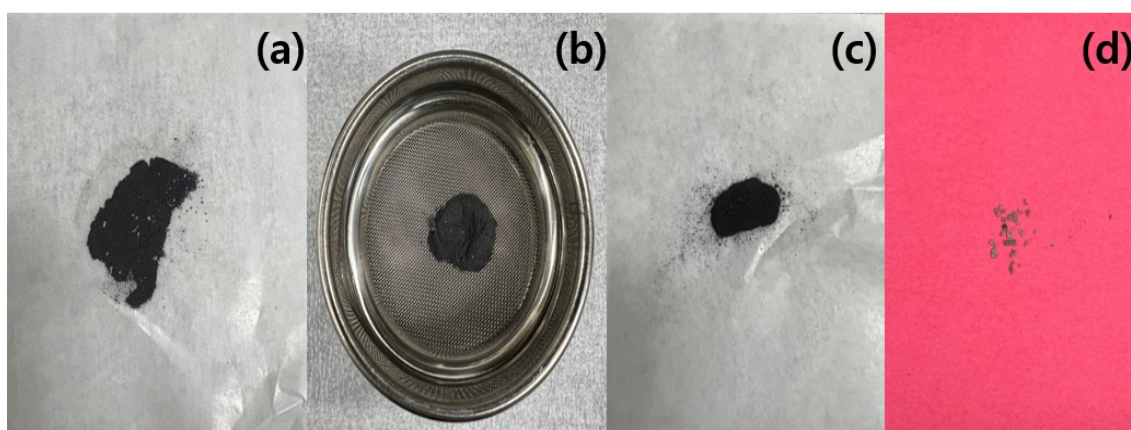

**Fig. S11** Photograph of a) Catalyst after reaction (residual PET + catalyst), b) sieve process, c) Catalyst after sieving, d) Separated residual PET.

## 8. References

1. Y. Jing, Y. Wang, S. Furukawa, J. Xia, C. Sun, M. J. Hülsey, H. Wang, Y. Guo, X. Liu and N. Yan, *Angew. Chem. Int. Ed.*, 2021, **60**, 5527-5535.
2. S. Hongkailers, Y. Jing, Y. Wang, N. Hinchiranan and N. Yan, *ChemSusChem*, 2021, **14**, 4330-4339.
3. H. Tang, N. Li, G. Li, A. Wang, Y. Cong, G. Xu, X. Wang and T. Zhang, *Green Chem.*, 2019, **21**, 2709-2719.
4. S. Lu, Y. Jing, B. Feng, Y. Guo, X. Liu and Y. Wang, *ChemSusChem*, 2021, **14**, 4242-4250.
5. Y. Jing, Y. Wang, S. Furukawa, J. Xia, C. Sun, M. J. Hülsey, H. Wang, Y. Guo, X. Liu and N. Yan, *Angew. Chem. Int. Ed.*, 2021, **60**, 5527-5535.
6. M. Golubeva, M. Mukhtarova, A. Sadovnikov and A. Maximov, *Polym.*, 2023, **15**, 2248.
7. P. Wu, G. Lu and C. Cai, *Green Chem.*, 2021, **23**, 8666-8672.
